# Supplementary material for: Population dynamics of Phaius flavus in southeast China: Reproductive strategies and plants conservation
Source: PubMed Central journal article supplement (PMC9377627; doi:10.1371/journal.pone.0272929), 2022-08-15
Supplement: pone.0272929.s001.pdf [file pone.0272929.s001.pdf]

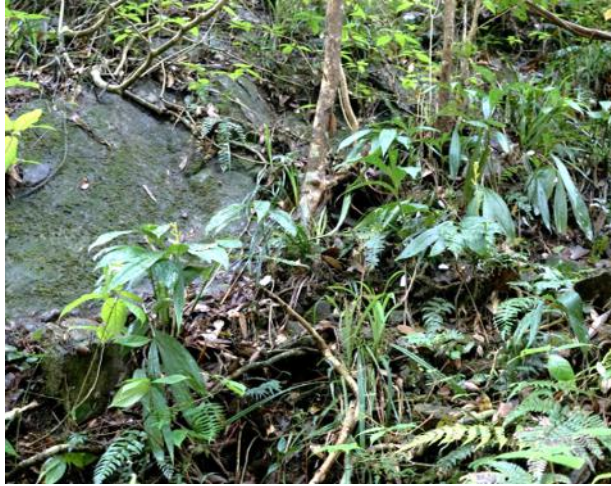

A. Habitat;

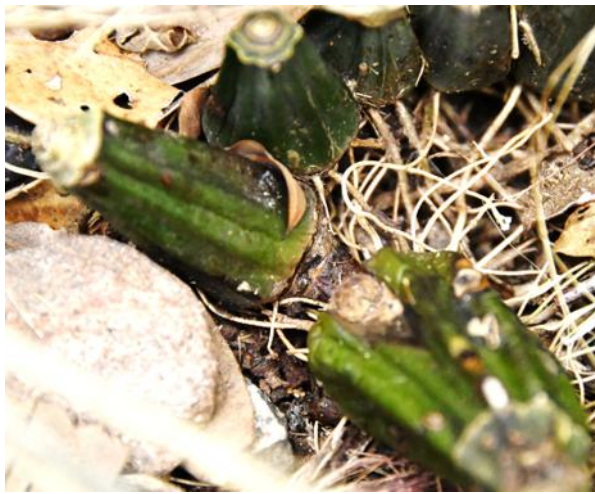

B. pseudobulbs and fleshy stems;

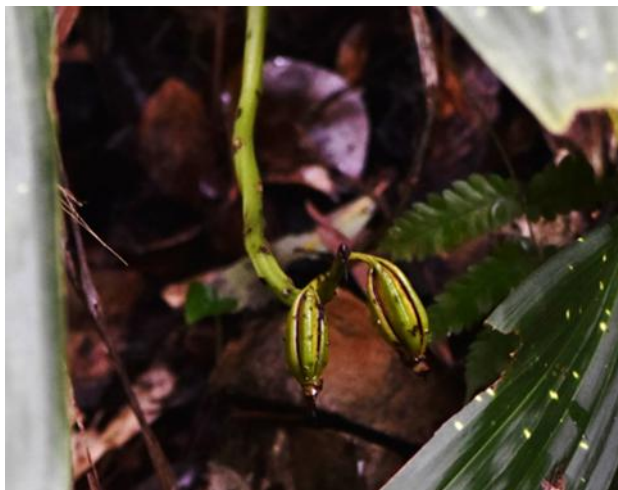

C. persistent dehiscent fruits ;

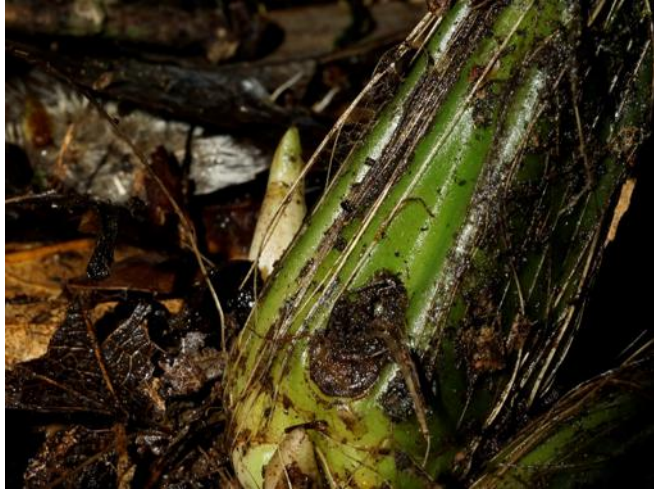

D. a budding bud
